# Supplementary material for: Applying standard addition to determine antimony isotopes in low-Sb samples using HG-MC-ICP-MS
Source: Royal Society of Chemistry journal article supplement (doi:10.1039/d4ja00333k), 2024-01-01
Supplement: d4ja00333k1.xlsx [file d4ja00333k1.xlsx]

## Sheet: data for NIST and SCP sb
	NIST 3102a uncorr	NIST3102a corr		Scp Uncorr		SCP corr
1	0.0673028	0.0544198	1.5	0.73	2	0.665
1.25	0.0563307	0.0279763	2.5	0.62	3	0.7
1.5	-0.0704361	-0.0439078	3.5	0.65	4	0.71
1.75	0.00275794	-0.0105499	4.5	0.76	5	0.74
2	-0.00419509	-0.0362347	5.5	0.68	6	0.7
2.25	0.00335856	0.0213593	6.5	0.74	7	0.7
2.5	0.0137256	0.00673029	7.5	0.66	8	0.66
2.75	0.0398232	0.0567291	8.5	0.74	9	0.72
3	-0.0422628	-0.0558823	9.5	0.62	10	0.65
3.25	-0.104302	-0.0610518	10.5	0.69	11	0.66
3.5	0.011854	0.0605842	11.5	0.62	12	0.67
3.75	0.00937188	0.0119136	12.5	0.72	13	0.68
4	0.00965547	-0.0217664	13.5	0.74	14	0.64
4.25	0.0462255	-0.0115528	14.5	0.64	15	0.66
4.5	-0.140756	-0.0375978	15.5	0.68	16	0.68
4.75	-0.0592488	-0.0242298	16.5	0.72	17	0.72
5	-0.0200368	-0.0503275	17.5	0.63	18	0.68
5.25	-0.0843169	-0.0473351	18.5	0.76	19	0.65
5.5	0.00557966	-0.00523875	19.5	0.64	20	0.73
5.75	-0.00845394	0.00851607	20.5	0.69	21	0.69
6	-0.080519	-0.0380158	21.5	0.67	22	0.75
6.25	0.0458128	0.00705761	22.5	0.65	23	0.65
6.5	-0.00624166	0.0404577	23.5	0.69	24	0.69
6.75	-0.00567871	-0.00964735	24.5	0.67	25	0.67
7	-0.0405048	-0.0250045	25.5	0.76	26	0.72
7.25	0.0106334	0.00483188	26.5	0.64	27	0.64
7.5	0.0359421	0.0205135	27.5	0.69	28	0.72
7.75	-0.0342912	-0.0119157	28.5	0.65	29	0.72
8	-0.00107462	-0.0229662	29.5	0.69	30	0.69
8.25	0.027405	0.0185306	30.5	0.65	31	0.73
8.5	-0.00917067	0.0125324	31.5	0.69	32	0.69
8.75	0.0915105	0.0403999	32.5	0.67	33	0.67
9	-0.0229681	-0.00272883	33.5	0.65	34	0.7
9.25	-0.0983088	-0.0377582	34.5	0.69	35	0.67
9.5	0.0699612	0.004869	35.5	0.69	36	0.64
9.75	-0.00474206	0.00766352	36.5	0.67	37	0.67
10	-0.0565724	0.00165454	37.5	0.65	38	0.65
10.25	-0.0126802	-0.0473201	38.5	0.77	39	0.68
10.5	0.0449668	0.0119462	39.5	0.74	40	0.65
10.75	0.0172299	0.0167656	40.5	0.66	41	0.7
11	-0.0154468	0.0142716	41.5	0.78	42	0.68
11.25	-0.0324514	-0.0239177	42.5	0.72	43	0.66
11.5	0.0639357	0.00972003	43.5	0.64	44	0.65
11.75	-0.0489827	-0.0420448	44.5	0.67	45	0.65
12	0.0232297	0.0341666	45.5	0.666	46	0.72
12.25	-0.0503552	-0.0430165	46.5	0.67	47	0.72
12.5	0.00353801	-0.0326028	47.5	0.6544	48	0.69
12.75	0.0307009	0.018366	48.5	0.72	49	0.65
13	0.0156428	0.0375977	49.5	0.64	50	0.671039
13.25	0.0159975	-0.0526702	50.5	0.67	51	0.665
13.5	-0.072867	0.0526729	51.5	0.666	52	0.65
13.75	0.027639	0.0281943	52.5	0.67	53	0.69
14	0.018696	-0.0356717	53.5	0.6544	54	0.689444
14.25	-0.0179455	-0.0466682	62.5	0.671099	63	0.671039
14.5	0.0148983	0.00907581	63.5	0.692804	64	0.696353
14.75	-0.00253988	0.022754	64.5	0.703066	65	0.68959
15	-0.036064	-0.0451499	65.5	0.661442	66	0.68125
15.25	0.064451	0.027421	66.5	0.680909	67	0.663506
15.5	0.0168874	0.00768265	67.5	0.71395	68	0.681338
15.75	0.0313755	0.0233014	68.5	0.700838	69	0.693007
16	0.0345126	0.0538038	69.5	0.712902	70	0.69263
16.25	-0.02008	-0.0286635	70.5	0.694045	71	0.677764
16.5	0.0190568	0.0210581	71.5	0.68859	72	0.685261
16.75	0.0133785	0.0127353	72.5	0.68801	73	0.692677
17	-0.0323211	-0.0137766	73.5	0.717819	74	0.689444
17.25	0.0216948	0.0141686	74.5	0.669889	75	0.667165
17.5	0.0449668	0.0119462	75.5	0.676001	76	0.674984
17.75	0.0223036	0.0290767	76.5	0.661442	77	0.696353
18	0.0784393	-0.00938358	77.5	0.700838	78	0.68125
18.25	0.0728688	0.0404269	78.5	0.694045	79	0.677764
18.5	-0.00221555	0.00608768
18.75	-0.00887119	-0.0281814
19	0.0232641	0.0568204
19.25	-0.0600103	-0.0641495
19.5	-0.0104577	-0.0265152
19.75	0.0449668	0.0119462		0.686585		0.685
20	-0.0340036	-0.0124163		0.0900677		0.0591608
20.25	0.109301	0.00796097
20.5	-0.00878543	-0.0122336
20.75	-0.0695993	-0.016833
21	0.0796048	0.0158814
21.25	-0.0924321	-0.0485102
21.5	0.0449668	0.0119462
21.75	-0.121732	-0.0362625
22	-0.0784224	-0.0212889
22.25	0.113535	0.0172443
22.5	-0.0392622	-0.0410053
22.75	-0.0152271	-0.00575748
23	0.0500357	0.0475975
23.25	-0.0721996	-0.0171838
23.5	0.0318447	0.0334173
23.75	0.0195894	0.0253955
24	-0.0436873	-0.0435691
24.25	0.105217	-0.00253971
24.5	-0.0362124	-0.0357915
24.75	0.0636423	0.02567
25	0.0360169	0.0452875
25.25	0.0295332	-0.0211607
25.5	0.109444	0.0400874
25.75	-0.116328	-0.0462605
26	-0.0104079	0.0456672
26.25	0.0131318	-0.0163709
26.5	-0.0301891	-0.0116983
26.75	-0.0133831	-0.0130943
27	-0.0439551	-0.024098
27.25	-0.0251563	-0.00978295
27.5	-0.0555122	-9.87171e-05
27.75	0.0969428	0.0529639
28	0.0652081	0.0450253
28.25	-0.0307198	0.00107747
28.5	-0.00504882	0.00780888
28.75	0.0682438	-0.00256262
29	-0.0531335	-0.0119609
29.25	-0.0125857	-0.0403552
29.5	0.0460532	0.0174867
29.75	-0.0231366	-0.0430827
30	0.0440525	0.0562797
30.25	0.0724412	0.00297925
30.5	0.0917423	0.0308492
30.75	-0.102921	-0.0233735
31	-0.0139984	-0.0021833
31.25	-0.0149535	-0.0528926
31.5	-0.0214056	0.030624
31.75	0.100307	0.0378985
32	-0.0144985	-0.0173506
32.25	0.0430055	0.0147653
32.5	0.0349271	0.0177451
32.75	0.082212	0.0506434
33	0.0727559	0.0167352
33.25	-0.0756669	-0.0395837
33.5	0.0720912	-0.0374075
33.75	-0.102601	-0.000152035
34	0.0323283	0.00256467
34.25	0.108374	0.00328203
34.5	-0.0171997	-0.0306975
34.75	0.0211545	-0.0353252
35	6.21301e-05	-0.0361559
35.25	0.0106634	0.0307816
35.5	0.0502154	-0.0406873
35.75	-0.00787641	-0.0170358
36	0.0260002	-0.0140424
36.25	-0.00131772	0.0066088
36.5	-0.00601775	0.00404285
36.75	-0.0168585	0.00195381
37	0.0091995	-0.00600509
37.25	0.00249337	0.000865592
37.5	-0.0102766	-0.0110638
37.75	-0.0161446	-0.013027
38	0.0706957	0.0706664
38.25	-0.0605508	-0.0248386
38.5	0.00923015	0.0124767
38.75	0.0516797	0.0534122
39	-0.00393452	-0.00454336
39.25	-0.0413286	-0.0424571
39.5	-0.0547575	-0.0576802
39.75	-0.0459667	-0.0446428
40	0.0393999	0.0312477
40.25	-0.0396793	-0.0197668
40.5	0.0143785	0.0299214
40.75	0.0202701	0.0103504
41	-0.00884582	-0.00117184
41.25	0.0232963	0.0247577
41.5	0.0656536	0.0159732
41.75	0.0325551	0.0326715
42	-0.0323558	-0.0583938
42.25	0.06284	0.0333567
42.5	-0.0389297	-0.0249148
42.75	0.0449668	0.0119462
43	-0.0281835	-0.0159181
43.25	0.0436892	0.0436136
43.5	0.0517868	0.0193166
43.75	-0.017844	-0.00967386
44	-0.0264245	0.0022512
44.25	-0.0471852	-0.0327274
44.5	-0.0506435	-0.0346667
44.75	-0.00440246	-0.0264091
45	0.0208288	0.00915473
45.25	0.0369357	0.0155398
45.5	0.04732	0.030374
45.75	0.0256532	0.0530713
46	0.0203588	0.0210873
46.25	0.00508455	0.00364065
46.5	-0.0275297	-0.0283336
46.75	0.0456355	0.0470419
47	-0.0359908	-0.0436848
47.25	-0.0454143	-0.0328197
47.5	0.0139528	0.0178719
47.75	-0.0166993	-0.0237959
48	0.0678971	0.0645539
48.25	0.0292031	-0.00545578
48.5	-0.0219079	0.00512458
48.75	0.0674741	0.0478074
49	-0.0452193	-0.0386643
49.25	-0.0127714	-0.0243748
49.5	0.0444845	0.0626437
49.75	-0.0492857	-0.0380898
50	0.0145845	-0.00595171
50.25	0.0337128	0.0381509
50.5	-0.0108832	0.021825
50.75	0.0449668	0.0119462
51	-0.00426802	0.000942763
51.25	-0.0602733	-0.061165
51.5	0.0079496	0.038087
51.75	-0.013834	-0.0238699
52	0.10656	-0.0280864
52.25	-0.104951	-0.0538013
52.5	0.0874227	0.0449723
52.75	0.0133147	0.0278404
53	0.0363954	-0.0447975
53.25	-0.101907	0.00709623
53.5	0.0112836	0.0271614
53.75	0.00288855	-0.0295173
54	-0.0180134	-0.0220708
54.25	-0.0721181	-0.0200635
54.5	0.0633986	0.00791069
54.75	-0.0093602	-0.011062
55	0.0407328	0.047988
55.25	-0.0294401	0.0197247
55.5	0.0248628	-0.00541782
55.75	-0.0316249	-0.0305795
56	0.0623593	0.0402218
56.25	0.0110495	0.0103745
56.5	0.0100549	-0.00113507
56.75	0.0350845	0.0344826
57	-0.0131095	-0.0137934
57.25	0.077111	0.0184441
57.5	-0.0583685	-0.0564309
57.75	0.0258814	0.0025418
58	-0.0742159	-0.0274901
58.25	0.0529388	0.037027
58.5	0.0566561	0.0170426
58.75	-0.0428405	-0.0379506
59	0.0197653	-0.00943878
59.25	0.00205685	0.00208952
59.5	-0.0183901	-0.0184327
59.75	-0.0191809	-0.0091645
60	-0.0213292	-0.0213328
60.25	0.0492871	-0.0348388
60.5	-0.0363794	-0.0363891
60.75	-0.0224543	-0.022424
61	0.0301735	0.0300269
61.25	0.100147	0.00986367
61.5	-0.0484116	-0.0502959
61.75	0.0244593	0.0253286
62	-0.0343328	-0.0338999
62.25	0.0415859	0.0410601
62.5	0.0468341	0.0468592
62.75	0.0260505	0.0252976
63	0.0148727	0.0154532
63.25	0.0350845	0.0344826
63.5	0.0361059	0.0363087
63.75	-0.0930641	-0.0254583
64	0.0407861	0.0422492
64.25	-0.0261424	-0.0265386
64.5	0.0754043	0.0357169
64.75	0.0110495	0.0103745
65	0.00205685	0.00208952
65.25	0.0557942	0.0549292
65.5	-0.0183901	-0.0184327
65.75	-0.0198136	-0.019005
66	-0.0499933	-0.047306
66.25	-0.0236074	-0.0289469
66.5	-0.0111227	-0.0121385
66.75	-0.023787	-0.0235944
67	-0.060229	-0.00218873
67.25	0.00104709	0.00122095
67.5	0.0932687	0.0520272
67.75	-0.0533069	-0.0526583
68	0.0356471	0.0353269
68.25	0.0524614	0.0530737
68.5	0.0134195	0.0122351
68.75	-0.0604268	0.000942763
69	-0.00426802	0.000942763
69.25	-0.0112028	-0.0128964
69.5	0.00974115	0.0112797
69.75	0.0601125	0.0584823
70	0.0566384	0.056385
70.25	-0.00426802	0.000942763
70.5	0.0437349	0.0434397
70.75	-0.0595213	-0.0591656
71	0.0433725	0.0446919
71.25	0.0622633	0.0220255
71.5	-0.0570557	-0.0570107
71.75	0.0252187	0.024842
72	-0.0330702	-0.0339215
72.25	0.0146238	0.0155377
72.5	-0.0665606	-0.00693993
72.75	-0.0402899	-0.0568324
73	0.0321592	0.0262341
73.25	-0.0290316	-0.0380191
73.5	-0.084983	-0.048404
73.75	-0.0629423	-0.0284312
74	-0.0197905	-0.020826
74.25	0.0488564	0.0439671
74.5	-0.0366885	-0.0342977
74.75	-0.00687293	-0.00271624
75	-0.0304766	-0.0299062
75.25	-0.0184456	-0.0203332
75.5	-0.064268	0.000942763
75.75	0.0314426	0.0283889
76	-0.027482	-0.0222939
76.25	0.0336195	0.0360574
76.5	0.0263339	0.0287242
76.75	0.0452454	0.0416041
77	-0.0564149	-0.0164867
77.25	0.0414464	0.0355003
77.5	0.0618102	0.0214988
77.75	0.0319553	0.0422102
78	-0.00426802	0.000942763
78.25	0.0449668	0.0119462
78.5	-0.00940206	-0.0124552
78.75	0.0407127	0.0402017
79	-0.0601869	-0.00883007
79.25	-0.00228957	-0.00218873
79.5	0.0763701	0.0209514
79.75	0.00998352	0.00721807
80	-0.0615208	-0.00716491
80.25	-0.00228957	-0.00218873
80.5	-0.00426802	0.000942763
80.75	-0.00426802	0.000942763
81	0.0695405	0.0231115
81.25	0.0415743	0.0345984
81.5	-0.0156613	-0.0106261
81.75	0.000672866	0.00852147
82	0.0406334	0.0332116
82.25	-0.065196	-0.0255537
82.5	0.05399	0.015581
82.75	-0.0541349	-0.0253333
Average	0.00331805	0.000349094
	0.0955722	0.0619308

## Sheet: raw data for Mass bias corr
NIST 3102a	-0.0144449	-0.262067	NIST 3102a 6ppb	-0.015044	-0.263082	NIST 3102a 6ppb	-0.0110279	-0.258143	NIST 3102a 6ppb	-0.018293	-0.265844	NIST 3102a	-0.0185498	-0.265884	NIST 3102a 3ppb	-0.0124741	-0.259165	NIST 3102a 3ppb	-0.024781	-0.27128	NIST 3102a 3ppb	-0.0171546	-0.264172	-0.0144449	-0.262067
NIST 3102a	-0.0145489	-0.262059	NIST 3102a 6ppb	-0.0150937	-0.263079	NIST 3102a 6ppb	-0.010955	-0.258104	NIST 3102a 6ppb	-0.0186917	-0.266167	NIST 3102a	-0.0184649	-0.265823	NIST 3102a 3ppb	-0.0124912	-0.259171	NIST 3102a 3ppb	-0.0249751	-0.271292	NIST 3102a 3ppb	-0.0173836	-0.264362	-0.0145489	-0.262059
NIST 3102a	-0.0143265	-0.261886	NIST 3102a 6ppb	-0.0155342	-0.263526	NIST 3102a 6ppb	-0.0113135	-0.2586	NIST 3102a 6ppb	-0.0187378	-0.266254	NIST 3102a	-0.0184608	-0.265842	NIST 3102a 3ppb	-0.0123624	-0.259125	NIST 3102a 3ppb	-0.0250103	-0.271403	NIST 3102a 3ppb	-0.0172059	-0.264078	-0.0143265	-0.261886
NIST 3102a	-0.014245	-0.261958	NIST 3102a 6ppb	-0.0155039	-0.263528	NIST 3102a 6ppb	-0.0111618	-0.258709	NIST 3102a 6ppb	-0.0187785	-0.266284	NIST 3102a	-0.0184956	-0.265875	NIST 3102a 3ppb	-0.0118213	-0.258503	NIST 3102a 3ppb	-0.0250401	-0.271435	NIST 3102a 3ppb	-0.0178343	-0.264847	-0.0144454	-0.262139
NIST 3102a	-0.0143975	-0.262103	NIST 3102a 6ppb	-0.0155135	-0.263556	NIST 3102a 6ppb	-0.0114203	-0.258682	NIST 3102a 6ppb	-0.018749	-0.266169	NIST 3102a	-0.0183759	-0.265735	NIST 3102a 3ppb	-0.0112448	-0.258113	NIST 3102a 3ppb	-0.0249556	-0.271507	NIST 3102a 3ppb	-0.017918	-0.264954	-0.014245	-0.261958
NIST 3102a	-0.0144341	-0.262169	NIST 3102a 6ppb	-0.0153669	-0.263359	NIST 3102a 6ppb	-0.0116068	-0.258868	NIST 3102a 6ppb	-0.0186527	-0.26614	NIST 3102a	-0.0182577	-0.265737	NIST 3102a 3ppb	-0.0110493	-0.25771	NIST 3102a 3ppb	-0.0251538	-0.271495	NIST 3102a 3ppb	-0.0179129	-0.264917	-0.0142047	-0.26193
NIST 3102a	-0.0138344	-0.261847	NIST 3102a 6ppb	-0.0152787	-0.263237	NIST 3102a 6ppb	-0.011447	-0.25873	NIST 3102a 6ppb	-0.0188027	-0.266113	NIST 3102a	-0.018442	-0.26585	NIST 3102a 3ppb	-0.0106101	-0.257351	NIST 3102a 3ppb	-0.0252703	-0.271616	NIST 3102a 3ppb	-0.0182015	-0.265114	-0.0143975	-0.262103
NIST 3102a	-0.0141516	-0.261854	NIST 3102a 6ppb	-0.0153462	-0.26333	NIST 3102a 6ppb	-0.0114714	-0.258958	NIST 3102a 6ppb	-0.01867	-0.266001	NIST 3102a	-0.0184654	-0.265834	NIST 3102a 3ppb	-0.0106955	-0.257617	NIST 3102a 3ppb	-0.0255759	-0.271637	NIST 3102a 3ppb	-0.0189654	-0.26581	-0.0143737	-0.262083
NIST 3102a	-0.0138562	-0.261743	NIST 3102a 6ppb	-0.015188	-0.263148	NIST 3102a 6ppb	-0.0114425	-0.258732	NIST 3102a 6ppb	-0.0187365	-0.266086	NIST 3102a	-0.018403	-0.265842	NIST 3102a 3ppb	-0.0106753	-0.257238	NIST 3102a 3ppb	-0.0254035	-0.271707	NIST 3102a 3ppb	-0.0189218	-0.265709	-0.0144341	-0.262169
NIST 3102a	-0.0138597	-0.261415	NIST 3102a 6ppb	-0.0152505	-0.263165	NIST 3102a 6ppb	-0.0115625	-0.258776	NIST 3102a 6ppb	-0.0182828	-0.265574	NIST 3102a	-0.0185387	-0.265818	NIST 3102a 3ppb	-0.01065	-0.257263	NIST 3102a 3ppb	-0.0254563	-0.271784	NIST 3102a 3ppb	-0.0185062	-0.26532	-0.0138344	-0.261847
NIST 3102a	-0.0137622	-0.261501	NIST 3102a 6ppb	-0.0147292	-0.262702	NIST 3102a 6ppb	-0.0115488	-0.258826	NIST 3102a 6ppb	-0.0183247	-0.265563	NIST 3102a	-0.0186421	-0.265823	NIST 3102a 3ppb	-0.0107551	-0.257731	NIST 3102a 3ppb	-0.0258621	-0.272007	NIST 3102a 3ppb	-0.01934	-0.266042	-0.0141516	-0.261854
NIST 3102a	-0.0134857	-0.261112	NIST 3102a 6ppb	-0.0151207	-0.263008	NIST 3102a 6ppb	-0.0114411	-0.258785	NIST 3102a 6ppb	-0.0180023	-0.265367	NIST 3102a	-0.0185644	-0.265841	NIST 3102a 3ppb	-0.0107681	-0.257357	NIST 3102a 3ppb	-0.0250779	-0.271686	NIST 3102a 3ppb	-0.0185779	-0.265363	-0.0141056	-0.261852
NIST 3102a	-0.012757	-0.260612	NIST 3102a 6ppb	-0.0146884	-0.26254	NIST 3102a 6ppb	-0.0116669	-0.258835	NIST 3102a 6ppb	-0.0183381	-0.265603	NIST 3102a	-0.0185426	-0.265828	NIST 3102a 3ppb	-0.0107867	-0.257179	NIST 3102a 3ppb	-0.0250283	-0.271803	NIST 3102a 3ppb	-0.0194989	-0.26614	-0.0138562	-0.261743
NIST 3102a	-0.013014	-0.260704	NIST 3102a 6ppb	-0.0147715	-0.262728	NIST 3102a 6ppb	-0.0114594	-0.258893	NIST 3102a 6ppb	-0.0178928	-0.265043	NIST 3102a	-0.0184859	-0.265785	NIST 3102a 3ppb	-0.0107937	-0.257762	NIST 3102a 3ppb	-0.0246814	-0.271302	NIST 3102a 3ppb	-0.0190818	-0.265884	-0.013776	-0.261546
NIST 3102a	-0.0129985	-0.260495	NIST 3102a 6ppb	-0.014682	-0.262615	NIST 3102a 6ppb	-0.0116028	-0.258846	NIST 3102a 6ppb	-0.0178888	-0.265121	NIST 3102a	-0.0182406	-0.265581	NIST 3102a 3ppb	-0.0111309	-0.257932	NIST 3102a 3ppb	-0.0244994	-0.270857	NIST 3102a 3ppb	-0.0197481	-0.266619	-0.0138597	-0.261415
NIST 3102a	-0.0128911	-0.260588	NIST 3102a 6ppb	-0.0146504	-0.262682	NIST 3102a 6ppb	-0.011424	-0.258747	NIST 3102a 6ppb	-0.0179849	-0.265146	NIST 3102a	-0.0183992	-0.265826	NIST 3102a 3ppb	-0.0113366	-0.258054	NIST 3102a 3ppb	-0.023983	-0.270334	NIST 3102a 3ppb	-0.0195435	-0.266299	-0.0137622	-0.261501
NIST 3102a	-0.0143669	-0.262175	NIST 3102a 6ppb	-0.0144098	-0.26236	NIST 3102a 6ppb	-0.0114992	-0.258766	NIST 3102a 6ppb	-0.0180258	-0.265248	NIST 3102a	-0.0175709	-0.265086	NIST 3102a 3ppb	-0.0112776	-0.258327	NIST 3102a 3ppb	-0.0239431	-0.270298	NIST 3102a 3ppb	-0.0202019	-0.266963	-0.0134698	-0.261286
NIST 3102a	-0.0140533	-0.261846	NIST 3102a 6ppb	-0.0148256	-0.262781	NIST 3102a 6ppb	-0.0115361	-0.258884	NIST 3102a 6ppb	-0.0180817	-0.265272	NIST 3102a	-0.0178413	-0.265262	NIST 3102a 3ppb	-0.0116728	-0.258195	NIST 3102a 3ppb	-0.0241403	-0.270411	NIST 3102a 3ppb	-0.0212907	-0.268043	-0.0134857	-0.261112
NIST 3102a	-0.0136199	-0.261531	NIST 3102a 6ppb	-0.0144208	-0.262438	NIST 3102a 6ppb	-0.0116841	-0.258974	NIST 3102a 6ppb			NIST 3102a	-0.0173414	-0.264759	NIST 3102a 3ppb	-0.0114616	-0.257971	NIST 3102a 3ppb	-0.0240495	-0.270343	NIST 3102a 3ppb	-0.0211278	-0.267943	-0.0132127	-0.261197
NIST 3102a	-0.0136495	-0.261574	NIST 3102a 6ppb	-0.0147783	-0.26265	NIST 3102a 6ppb	-0.0117594	-0.259075	NIST 3102a 6ppb			NIST 3102a	-0.0173332	-0.264748	NIST 3102a 3ppb	-0.0118117	-0.258787	NIST 3102a 3ppb	-0.0239724	-0.270381	NIST 3102a 3ppb	-0.0218265	-0.268514	-0.012757	-0.260612
NIST 3102a	-0.0140438	-0.261912	NIST 3102a 6ppb	-0.0145836	-0.262542	NIST 3102a 6ppb	-0.0115705	-0.259003	NIST 3102a 6ppb			NIST 3102a	-0.0169446	-0.264371	NIST 3102a 3ppb	-0.0119271	-0.258487	NIST 3102a 3ppb	-0.024161	-0.270456	NIST 3102a 3ppb	-0.0228342	-0.269488	-0.0129989	-0.260904
NIST 3102a	-0.0135928	-0.26163	NIST 3102a 6ppb	-0.0147383	-0.262729	NIST 3102a 6ppb	-0.0115187	-0.258795	NIST 3102a 6ppb			NIST 3102a	-0.0164835	-0.263973	NIST 3102a 3ppb	-0.0121325	-0.258641	NIST 3102a 3ppb	-0.0239371	-0.270205	NIST 3102a 3ppb	-0.0226205	-0.269342	-0.013014	-0.260704
NIST 3102a	-0.0140283	-0.26173	NIST 3102a 6ppb	-0.0148121	-0.262664	NIST 3102a 6ppb	-0.0113637	-0.258679	NIST 3102a 6ppb			NIST 3102a	-0.0162043	-0.263572	NIST 3102a 3ppb	-0.0125708	-0.259474	NIST 3102a 3ppb	-0.0240314	-0.270275	NIST 3102a 3ppb	-0.0229661	-0.269605	-0.0128544	-0.260938
NIST 3102a	-0.0139001	-0.261796	NIST 3102a 6ppb	-0.0145469	-0.262525	NIST 3102a 6ppb	-0.0113263	-0.258631	NIST 3102a 6ppb			NIST 3102a	-0.0164487	-0.263842	NIST 3102a 3ppb	-0.0121341	-0.258661	NIST 3102a 3ppb	-0.0237957	-0.270113		-0.0230285	-0.269717	-0.0129985	-0.260495
NIST 3102a	-0.0141942	-0.261917	NIST 3102a 6ppb	-0.0147204	-0.262581	NIST 3102a 6ppb	-0.0112615	-0.258597	NIST 3102a 6ppb			NIST 3102a	-0.0166875	-0.264172	NIST 3102a 3ppb	-0.0129338	-0.259435	NIST 3102a 3ppb	-0.0236712	-0.270125				-0.0128911	-0.260588
NIST 3102a	-0.0151137	-0.26302	NIST 3102a 6ppb	-0.0146334	-0.262537	NIST 3102a 6ppb	-0.0112054	-0.258597	NIST 3102a 6ppb			NIST 3102a	-0.0157263	-0.263221	NIST 3102a 3ppb	-0.0130211	-0.259545	NIST 3102a 3ppb	-0.0235125	-0.269645				-0.0147153	-0.262353
NIST 3102a	-0.0152208	-0.263034	NIST 3102a 6ppb	-0.0142468	-0.262187	NIST 3102a 6ppb	-0.0115802	-0.258927	NIST 3102a 6ppb			NIST 3102a	-0.0162264	-0.263738	NIST 3102a 3ppb	-0.0137066	-0.260756	NIST 3102a 3ppb	-0.023015	-0.26943				-0.0143669	-0.262175
NIST 3102a	-0.0154566	-0.263585	NIST 3102a 6ppb	-0.0144583	-0.262322	NIST 3102a 6ppb	-0.0116282	-0.258776	NIST 3102a 6ppb			NIST 3102a	-0.0158533	-0.263278	NIST 3102a 3ppb	-0.0142449	-0.261227	NIST 3102a 3ppb	-0.0231608	-0.269552				-0.0146009	-0.26234
NIST 3102a	-0.0154343	-0.263562	NIST 3102a 6ppb	-0.0143344	-0.262276	NIST 3102a 6ppb	-0.0113733	-0.258768	NIST 3102a 6ppb			NIST 3102a	-0.015484	-0.26291	NIST 3102a 3ppb	-0.0142912	-0.260962	NIST 3102a 3ppb	-0.0230893	-0.269423				-0.0140533	-0.261846
NIST 3102a	-0.015044	-0.263082	NIST 3102a 6ppb	-0.0141406	-0.262068	NIST 3102a 6ppb	-0.0113867	-0.258732	NIST 3102a 6ppb			NIST 3102a	-0.016724	-0.264123	NIST 3102a 3ppb	-0.0146358	-0.261717	NIST 3102a 3ppb	-0.0231892	-0.269601				-0.013891	-0.261645
NIST 3102a	-0.0155342	-0.263526	NIST 3102a 6ppb	-0.0138365	-0.261806	NIST 3102a 6ppb	-0.0113073	-0.258655	NIST 3102a 6ppb			NIST 3102a	-0.0165427	-0.263978	NIST 3102a 3ppb	-0.0146958	-0.261296	NIST 3102a 3ppb	-0.0229191	-0.269463				-0.0136199	-0.261531
NIST 3102a	-0.0155135	-0.263556	NIST 3102a 6ppb	-0.0134584	-0.261374	NIST 3102a 6ppb	-0.0114493	-0.258795	NIST 3102a 6ppb			NIST 3102a	-0.0155695	-0.263004	NIST 3102a 3ppb	-0.0149878	-0.262054	NIST 3102a 3ppb	-0.0229659	-0.269284				-0.0136495	-0.261574
NIST 3102a	-0.0152787	-0.263237	NIST 3102a 6ppb	-0.0134447	-0.261285	NIST 3102a 6ppb	-0.0110952	-0.25824	NIST 3102a 6ppb			NIST 3102a	-0.015175	-0.262604	NIST 3102a 3ppb	-0.0146587	-0.261497	NIST 3102a 3ppb	-0.0227698	-0.269168				-0.0142839	-0.261876
NIST 3102a	-0.0153462	-0.26333		-0.0135554	-0.261371	NIST 3102a 6ppb	-0.0112215	-0.258427	NIST 3102a 6ppb			NIST 3102a	-0.0158409	-0.263251	NIST 3102a 3ppb	-0.0158091	-0.262874	NIST 3102a 3ppb	-0.0227927	-0.2692				-0.0140438	-0.261912
NIST 3102a	-0.015188	-0.263148		-0.0130351	-0.261058	NIST 3102a 6ppb	-0.0112096	-0.258516	NIST 3102a 6ppb			NIST 3102a	-0.0173469	-0.264764	NIST 3102a 3ppb	-0.0163888	-0.262959	NIST 3102a 3ppb	-0.0229946	-0.269355				-0.0139927	-0.261673
NIST 3102a	-0.0152505	-0.263165		-0.0130891	-0.260986	NIST 3102a 6ppb	-0.0116402	-0.258898	NIST 3102a 6ppb			NIST 3102a	-0.0174815	-0.26484	NIST 3102a 3ppb	-0.0166441	-0.263559	NIST 3102a 3ppb	-0.0227453	-0.269218				-0.0135928	-0.26163
NIST 3102a	-0.0147292	-0.262702		-0.0141611	-0.26213	NIST 3102a 6ppb	-0.011515	-0.258838	NIST 3102a 6ppb			NIST 3102a	-0.01758	-0.264924	NIST 3102a 3ppb	-0.0180135	-0.265278	NIST 3102a 3ppb	-0.0224727	-0.269023				-0.0140283	-0.26173
NIST 3102a	-0.0151207	-0.263008		-0.0155903	-0.263456	NIST 3102a 6ppb	-0.0116233	-0.258893	NIST 3102a 6ppb			NIST 3102a	-0.0177501	-0.265084	NIST 3102a 3ppb	-0.0171306	-0.264029	NIST 3102a 3ppb	-0.022781	-0.269089				-0.0139001	-0.261796
NIST 3102a	-0.0146884	-0.26254		-0.015027	-0.263009	NIST 3102a 6ppb	-0.0116178	-0.25884	NIST 3102a 6ppb			NIST 3102a	-0.01796	-0.265226	NIST 3102a 3ppb	-0.0167946	-0.263946	NIST 3102a 3ppb	-0.0225898	-0.26896				-0.0141942	-0.261917
NIST 3102a	-0.014682	-0.262615		-0.0157576	-0.263636	NIST 3102a 6ppb	-0.011338	-0.258762	NIST 3102a 6ppb			NIST 3102a	-0.0181002	-0.265395	NIST 3102a 3ppb	-0.0171941	-0.264379	NIST 3102a 3ppb	-0.0229618	-0.269197				-0.0148024	-0.262802
NIST 3102a	-0.0146504	-0.262682				NIST 3102a 6ppb	-0.0114604	-0.258946	NIST 3102a 6ppb			NIST 3102a	-0.0183307	-0.265495	NIST 3102a 3ppb	-0.0173402	-0.264358	NIST 3102a 3ppb	-0.0229521	-0.269312				-0.0151137	-0.26302
NIST 3102a	-0.0148256	-0.262781				NIST 3102a 6ppb	-0.0114467	-0.258709	NIST 3102a 6ppb			NIST 3102a	-0.0175865	-0.264831	NIST 3102a 3ppb	-0.0173879	-0.264161		-0.0244153	-0.270679				-0.0152208	-0.263034
NIST 3102a	-0.0147783	-0.26265					-0.011443	-0.258746	NIST 3102a 6ppb			NIST 3102a	-0.016262	-0.263533	NIST 3102a 3ppb	-0.0173036	-0.263931		-0.0246937	-0.270945				-0.0152936	-0.263349
NIST 3102a	-0.0147383	-0.262729					-0.0117038	-0.259009	NIST 3102a 6ppb			NIST 3102a	-0.0177662	-0.265024	NIST 3102a 3ppb	-0.0172793	-0.264284		-0.0249707	-0.27102				-0.0154566	-0.263585
NIST 3102a	-0.0145469	-0.262525					-0.0115051	-0.258896	NIST 3102a 6ppb			NIST 3102a	-0.0179306	-0.265242	NIST 3102a 3ppb	-0.0175761	-0.26431		-0.0247437	-0.270955				-0.0153826	-0.263347
NIST 3102a	-0.0146334	-0.262537					-0.0113631	-0.258716	NIST 3102a 6ppb			NIST 3102a	-0.017905	-0.265219	NIST 3102a 3ppb	-0.0177558	-0.264417		-0.0246223	-0.270939				-0.0154343	-0.263562
							-0.011441	-0.258716	NIST 3102a 6ppb			NIST 3102a			NIST 3102a 3ppb	-0.0178058	-0.264788		-0.024556	-0.270969				-0.0156508	-0.263618
							-0.0113977	-0.258816	NIST 3102a 6ppb			NIST 3102a			NIST 3102a 3ppb	-0.0175333	-0.264337		-0.0246557	-0.27091				-0.015044	-0.263082
							-0.0112182	-0.258641	NIST 3102a 6ppb						NIST 3102a 3ppb	-0.0177252	-0.264477		-0.0249516	-0.270863				-0.0155342	-0.263526
							-0.0112987	-0.258557								-0.0178604	-0.264941		-0.0248505	-0.27094				-0.0155135	-0.263556
							-0.0111875	-0.258572								-0.0178558	-0.26463		-0.0245331	-0.270769				-0.0153669	-0.263359
							-0.0113454	-0.258468								-0.0177445	-0.264475		-0.0249349	-0.271012				-0.0152787	-0.263237
							-0.0112107	-0.258551								-0.0178731	-0.26485		-0.0246564	-0.270817				-0.0153462	-0.26333
							-0.0112745	-0.258589								-0.0179176	-0.264802		-0.0247334	-0.270842				-0.015188	-0.263148
							-0.0115898	-0.259068								-0.0178959	-0.264713		-0.0246349	-0.270777				-0.0152505	-0.263165
							-0.0111107	-0.258407								-0.0179275	-0.26502		-0.024872	-0.271125				-0.0147292	-0.262702
							-0.0110889	-0.25851								-0.0180893	-0.265098		-0.0244599	-0.270903				-0.0151207	-0.263008
							-0.0111019	-0.258451								-0.0185302	-0.265007		-0.0248214	-0.270832				-0.0146884	-0.26254
							-0.0111544	-0.258588								-0.0184745	-0.265025		-0.0255935	-0.271468				-0.0147715	-0.262728
							-0.0112541	-0.258751								-0.0192063	-0.266099		-0.0228377	-0.269229				-0.014682	-0.262615
							-0.0113364	-0.258758								-0.018918	-0.265855		-0.0230927	-0.269378				-0.0146504	-0.262682
							-0.0113766	-0.259026								-0.0188781	-0.265286		-0.0230816	-0.269413				-0.0144098	-0.26236
							-0.0117034	-0.259186								-0.0189025	-0.265398		-0.0221423	-0.268574				-0.0148256	-0.262781
							-0.0116492	-0.259183								-0.0188883	-0.265834		-0.0220462	-0.268528				-0.0144208	-0.262438
							-0.0115619	-0.25903											-0.0210566	-0.267782				-0.0147783	-0.26265
							-0.0124257	-0.260085											-0.0213257	-0.267929				-0.0145836	-0.262542
							-0.012119	-0.259822											-0.0217509	-0.268168				-0.0147383	-0.262729
							-0.0120549	-0.259591											-0.0218487	-0.268225				-0.0148121	-0.262664
							-0.0128262	-0.260497											-0.0215406	-0.268095				-0.0145469	-0.262525
							-0.0124261	-0.260006											-0.0213618	-0.267921				-0.0147204	-0.262581
							-0.0112438	-0.258641											-0.0214424	-0.267865				-0.0146334	-0.262537
							-0.0113801	-0.258713											-0.0216326	-0.268149				-0.0142468	-0.262187
							-0.0113082	-0.258849											-0.0216611	-0.268373				-0.0144583	-0.262322
							-0.0114116	-0.258808											-0.0216971	-0.268369				-0.0143344	-0.262276
							-0.0114371	-0.258912											-0.021928	-0.268426				-0.0141406	-0.262068
							-0.0114864	-0.258959											-0.0216563	-0.268322				-0.0138365	-0.261806
							-0.0114061	-0.258858											-0.0216413	-0.268131				-0.0134584	-0.261374
							-0.0113592	-0.258887											-0.0211691	-0.267657				-0.0134447	-0.261285
							-0.011434	-0.258733											-0.02142	-0.267933				-0.0135554	-0.261371
							-0.0114264	-0.258854											-0.0213379	-0.267949				-0.0130351	-0.261058
							-0.0114722	-0.258865											-0.0211423	-0.267744				-0.0130891	-0.260986
							-0.0114384	-0.258842											-0.0209733	-0.267571				-0.0141611	-0.26213
							-0.011403	-0.258731											-0.0213052	-0.267888				-0.0155903	-0.263456
							-0.0113724	-0.258756											-0.0214291	-0.26788				-0.015027	-0.263009
							-0.0113361	-0.258704																-0.0157576	-0.263636
							-0.0118198	-0.259257																-0.0248505	-0.27094
							-0.0111139	-0.258371																-0.0245331	-0.270769
							-0.0114028	-0.258749																-0.0249349	-0.271012
							-0.0115647	-0.259083																-0.0246564	-0.270817
							-0.0135143	-0.261115																-0.0247334	-0.270842
							-0.0111712	-0.258422																-0.0246349	-0.270777
							-0.0121356	-0.259776																-0.024872	-0.271125
							-0.0121529	-0.259708																-0.0244599	-0.270903
							-0.0123007	-0.259879																-0.0248214	-0.270832
							-0.0133984	-0.26114																-0.0255935	-0.271468
							-0.0135365	-0.261288																-0.0228377	-0.269229
							-0.0140868	-0.261825																-0.0230927	-0.269378
							-0.0138691	-0.261637																-0.0230816	-0.269413
							-0.0140555	-0.261845																-0.0221423	-0.268574
							-0.0139887	-0.261761																-0.0220462	-0.268528
							-0.0139179	-0.261646																-0.0210566	-0.267782
							-0.0135752	-0.261194																-0.0213257	-0.267929
							-0.0134411	-0.261123																-0.0214558	-0.268062
							-0.0137812	-0.261437																-0.0217509	-0.268168
							-0.0133625	-0.260943																-0.0218487	-0.268225
							-0.0135459	-0.261196																-0.0215406	-0.268095
							-0.0132563	-0.260803																-0.0213618	-0.267921
							-0.013243	-0.260795																-0.0214424	-0.267865
							-0.0127943	-0.260325																-0.0216326	-0.268149
							-0.0121695	-0.259683																-0.0216611	-0.268373
							-0.0125144	-0.260068																-0.0216971	-0.268369
							-0.0122954	-0.259829																-0.021928	-0.268426
							-0.0124567	-0.259914																-0.0216563	-0.268322
							-0.0122234	-0.259729																-0.0216413	-0.268131
							-0.0122927	-0.259662																-0.0211691	-0.267657
							-0.0122633	-0.259749																-0.02142	-0.267933
							-0.0121357	-0.259703																-0.0213379	-0.267949
							-0.0120842	-0.259539																-0.0212805	-0.267874
							-0.0121623	-0.259639																-0.0219494	-0.268035
							-0.0130742	-0.260688																-0.0223523	-0.268332
							-0.0128968	-0.260531																-0.0221769	-0.268241
							-0.0125576	-0.260198																-0.0225649	-0.268552
							-0.012738	-0.260312																-0.0224779	-0.268622
							-0.0122059	-0.259729																-0.0225532	-0.268625
							-0.0125284	-0.260131																-0.0227425	-0.268753
							-0.0128899	-0.26054																-0.0229641	-0.268942
							-0.0136383	-0.26139																-0.0228087	-0.268853
							-0.0131201	-0.260778																-0.0226113	-0.268553
							-0.0128372	-0.260453																-0.0227578	-0.268804
							-0.013066	-0.260811																-0.0225237	-0.268684
							-0.0127996	-0.260485																-0.0225161	-0.268606
							-0.0145532	-0.262304																-0.0224519	-0.268529
							-0.0142654	-0.261913																-0.0226135	-0.268611
							-0.0140516	-0.261735																-0.0220775	-0.268296
							-0.0133436	-0.260953																-0.0219662	-0.268123
							-0.0140519	-0.261725																-0.0225092	-0.268579
							-0.0133571	-0.261004																-0.0226808	-0.268538
							-0.0130699	-0.260722																-0.0225103	-0.26841
							-0.0142219	-0.261978																-0.0221791	-0.268049
							-0.0138495	-0.26149																-0.0222257	-0.268321
							-0.014276	-0.262067																-0.0222462	-0.268173
							-0.0144496	-0.262175																-0.0218914	-0.268087
							-0.0153965	-0.263035																-0.0218626	-0.267871
							-0.0152534	-0.262936																-0.0215002	-0.267775
							-0.0156063	-0.263293																-0.0221513	-0.267916
							-0.0165872	-0.264439																-0.0213918	-0.267385
							-0.0161604	-0.263931																-0.0213107	-0.267461
							-0.0169783	-0.264667																-0.0215731	-0.26774
							-0.0179215	-0.265503																-0.0212047	-0.267383
							-0.017753	-0.265322																-0.0210424	-0.267146
							-0.0181327	-0.265698																-0.021133	-0.267068
							-0.0184039	-0.26597																-0.0210721	-0.267055
							-0.0185374	-0.266105																-0.0205848	-0.266602
							-0.0184132	-0.265969																-0.0210029	-0.267144
							-0.0184972	-0.266043																-0.0210349	-0.266987
																								-0.0206126	-0.266786
																								-0.0204162	-0.266484
																								-0.0204892	-0.266646
																								-0.0204943	-0.266578
																								-0.0203537	-0.266334
																								-0.0205809	-0.266632
																								-0.018293	-0.265844
																								-0.0186917	-0.266167
																								-0.0187378	-0.266254
																								-0.0187785	-0.266284
																								-0.018749	-0.266169
																								-0.0186527	-0.26614
																								-0.0188027	-0.266113
																								-0.01867	-0.266001
																								-0.0187365	-0.266086
																								-0.0182828	-0.265574
																								-0.0183247	-0.265563
																								-0.0180023	-0.265367
																								-0.0183381	-0.265603
																								-0.0178928	-0.265043
																								-0.0178888	-0.265121
																								-0.0179849	-0.265146
																								-0.0180258	-0.265248
																								-0.0180817	-0.265272
																								-0.0185498	-0.265884
																								-0.0184956	-0.265875
																								-0.0183759	-0.265735
																								-0.0184654	-0.265834
																								-0.0179079	-0.2652
																								-0.0185387	-0.265818
																								-0.0185426	-0.265828
																								-0.0184859	-0.265785
																								-0.0175709	-0.265086
																								-0.0178413	-0.265262
																								-0.0169446	-0.264371
																								-0.0162043	-0.263572
																								-0.0166875	-0.264172
																								-0.0157263	-0.263221
																								-0.0162264	-0.263738
																								-0.0158533	-0.263278
																								-0.015484	-0.26291
																								-0.016724	-0.264123
																								-0.0165427	-0.263978
																								-0.0155695	-0.263004
																								-0.015175	-0.262604
																								-0.0158409	-0.263251
																								-0.0173469	-0.264764
																								-0.0177501	-0.265084
																								-0.0183307	-0.265495
																								-0.0175865	-0.264831
																								-0.016262	-0.263533
																								-0.0177662	-0.265024
																								-0.0179306	-0.265242
																								-0.017905	-0.265219
																								-0.00819156	-0.256197
																								-0.00811554	-0.256193
																								-0.00827373	-0.256232
																								-0.00833262	-0.256127
																								-0.00822201	-0.256146
																								-0.00828946	-0.256223
																								-0.00835299	-0.256426
																								-0.00854702	-0.256753
																								-0.00852766	-0.256469
																								-0.00844435	-0.256523
																								-0.0084259	-0.256502
																								-0.00839322	-0.256347
																								-0.00869822	-0.256295
																								-0.00867603	-0.256692
																								-0.00872031	-0.256879
																								-0.00845323	-0.256633
																								-0.00850396	-0.25645
																								-0.00844254	-0.256311
																								-0.00862015	-0.256742
																								-0.00857123	-0.256361
																								-0.00829924	-0.25635
																								-0.00841551	-0.256202
																								-0.0082326	-0.256251
																								-0.00822705	-0.256223
																								-0.00824802	-0.256223
																								-0.00841995	-0.256438
																								-0.00833605	-0.256098
																								-0.00834795	-0.256445
																								-0.00865595	-0.256603
																								-0.00828583	-0.256327
																								-0.00817936	-0.25628
																								-0.00819428	-0.256348
																								-0.00833252	-0.256401
																								-0.00804437	-0.256313
																								-0.00828765	-0.25636
																								-0.00840402	-0.256446
																								-0.0087654	-0.256752
																								-0.00909009	-0.257131
																								-0.0091678	-0.257158
																								-0.00929567	-0.257325
																								-0.00936148	-0.257336
																								-0.00989661	-0.257817
																								-0.0100188	-0.257803
																								-0.0101914	-0.257958
																								-0.0102875	-0.258031
																								-0.010712	-0.258475
																								-0.0113006	-0.258962
																								-0.0115771	-0.259221
