# Supplementary material for: Applying standard addition to determine antimony isotopes in low-Sb samples using HG-MC-ICP-MS
Source: Royal Society of Chemistry journal article supplement (doi:10.1039/d4ja00333k), 2024-01-01
Supplement: d4ja00333k2.pdf [file d4ja00333k2.pdf]

## Supplementary information

### Applying standard addition to determine antimony isotopes in low-Sb samples using HG-MC-ICP-MS

Honggang Zhu<sup>a</sup>, Jian-Ming Zhu<sup>a\*</sup>, Decan Tan<sup>b</sup>, Zhuo Lu<sup>a</sup>, Hongfei Liao<sup>a</sup>, Yiwei Ma<sup>a</sup>

a. State Key Laboratory of Geological Processes and Mineral Resources, and Frontiers Science Center for Deep-time Digital Earth, China University of Geosciences (Beijing), Beijing, 100083, China.

b. State Key Laboratory of Environmental Geochemistry, Institute of Geochemistry, CAS, Guiyang, 550081, China

\* Corresponding author: Jian-Ming Zhu

Phone: 86-010-82322832.

E-mail: jmzhu@cugb.edu.cn

ORCID: 0000-0003-4977-6072

Revised version submitted to: JAAS  
2024-10-25

### Contents

1. Table S1. Operating parameters for Sb isotope measurement on HG-MC-ICP-MS
2. Fig. S1. Long-term reproducibility of the corrected and uncorrected  $\delta^{123}\text{Sb}$  values of NIST 3102a and SCP standard solutions.
3. Text S1. The precision estimated by propagation error

**Table S1.** Operating parameters for Sb isotope measurement on HG-MC-ICP-MS

| Parameters                | Neptune plus                                                                                                                                                                                                                                                             | Nu plasma II                                                                                                                                                                                                                                                             |
|---------------------------|--------------------------------------------------------------------------------------------------------------------------------------------------------------------------------------------------------------------------------------------------------------------------|--------------------------------------------------------------------------------------------------------------------------------------------------------------------------------------------------------------------------------------------------------------------------|
| Cup configuration         | L4 ( <sup>111</sup> Cd), L3 ( <sup>112</sup> Cd, <sup>112</sup> Sn),<br>L2 ( <sup>113</sup> Cd), L1 ( <sup>114</sup> Cd, <sup>114</sup> Sn),<br>C( <sup>117</sup> Sn),H1( <sup>119</sup> Sn),H2( <sup>121</sup> Sb),<br>H3 ( <sup>123</sup> Sb), H4 ( <sup>126</sup> Te) | L4( <sup>111</sup> Cd),L3( <sup>112</sup> Cd),L2( <sup>113</sup> Cd),<br>L1( <sup>114</sup> Cd),Ax( <sup>115</sup> In),H1( <sup>116</sup> Cd),<br>H2( <sup>117</sup> Sn),H3( <sup>118</sup> Sn),H6( <sup>121</sup> Sb),<br>H7( <sup>123</sup> Sb),H8( <sup>125</sup> Te) |
| <b>Inlet system</b>       |                                                                                                                                                                                                                                                                          |                                                                                                                                                                                                                                                                          |
| cool gas                  | 15 L min <sup>-1</sup>                                                                                                                                                                                                                                                   | 13 L.min <sup>-1</sup>                                                                                                                                                                                                                                                   |
| aux gas                   | 0.80-1.15 L min <sup>-1</sup>                                                                                                                                                                                                                                            | 0.85-0.9 L.min <sup>-1</sup>                                                                                                                                                                                                                                             |
| sample gas                | 0.85-1.10 L min <sup>-1</sup>                                                                                                                                                                                                                                            | 0.90-1.30 L min <sup>-1</sup>                                                                                                                                                                                                                                            |
| RF power                  | 1200W                                                                                                                                                                                                                                                                    | 1300W                                                                                                                                                                                                                                                                    |
| sample cone               | H type, Ni                                                                                                                                                                                                                                                               | Ni, 541b                                                                                                                                                                                                                                                                 |
| skimmer cone              | X type, Ni                                                                                                                                                                                                                                                               | Ni, 540                                                                                                                                                                                                                                                                  |
| resolution mode           | low                                                                                                                                                                                                                                                                      | low                                                                                                                                                                                                                                                                      |
| sample uptake             | 110 μL min <sup>-1</sup>                                                                                                                                                                                                                                                 | 110 μL min <sup>-1</sup>                                                                                                                                                                                                                                                 |
| <b>Aridus II</b>          |                                                                                                                                                                                                                                                                          |                                                                                                                                                                                                                                                                          |
| spray chamber temperature | 110°C                                                                                                                                                                                                                                                                    | 110°C                                                                                                                                                                                                                                                                    |
| desolvator temperature    | 160°C                                                                                                                                                                                                                                                                    | 160°C                                                                                                                                                                                                                                                                    |
| Ar sweep gas              | 2.0-2.5 L min <sup>-1</sup>                                                                                                                                                                                                                                              | 1.8 L min <sup>-1</sup> (adjusted daily)                                                                                                                                                                                                                                 |
| nitrogen gas              | 1-6 mL min <sup>-1</sup>                                                                                                                                                                                                                                                 | 2-6 mL min <sup>-1</sup> (adjusted daily)                                                                                                                                                                                                                                |
| <b>Hydride generator</b>  |                                                                                                                                                                                                                                                                          |                                                                                                                                                                                                                                                                          |
| Washing solution          | 1.5 M HCl                                                                                                                                                                                                                                                                | 3 M HCl                                                                                                                                                                                                                                                                  |
| NaBH <sub>4</sub>         | 0.4 wt% NaBH <sub>4</sub> in 0.4 wt%<br>NaOH                                                                                                                                                                                                                             | 0.4 wt% NaBH <sub>4</sub> in 0.4 wt%<br>NaOH                                                                                                                                                                                                                             |
| Sample media              | 1.5 M HCl                                                                                                                                                                                                                                                                | 3 M HCl                                                                                                                                                                                                                                                                  |
| Add Ar sweep gas          | 0.02-0.04 L min <sup>-1</sup>                                                                                                                                                                                                                                            | 0.07~0.2 L min <sup>-1</sup>                                                                                                                                                                                                                                             |
| sensitivity               | ~2500V/ μg mL <sup>-1</sup> for <sup>123</sup> Sb                                                                                                                                                                                                                        | ~1500V/ μg mL <sup>-1</sup> for <sup>123</sup> Sb                                                                                                                                                                                                                        |
| injecting concentration   | 3 ng mL <sup>-1</sup>                                                                                                                                                                                                                                                    | 6 ng mL <sup>-1</sup>                                                                                                                                                                                                                                                    |

**Fig.S1** Long-term reproducibility of the corrected and uncorrected  $\delta^{123}\text{Sb}$  value of NIST 3102a and SCP standard solutions.

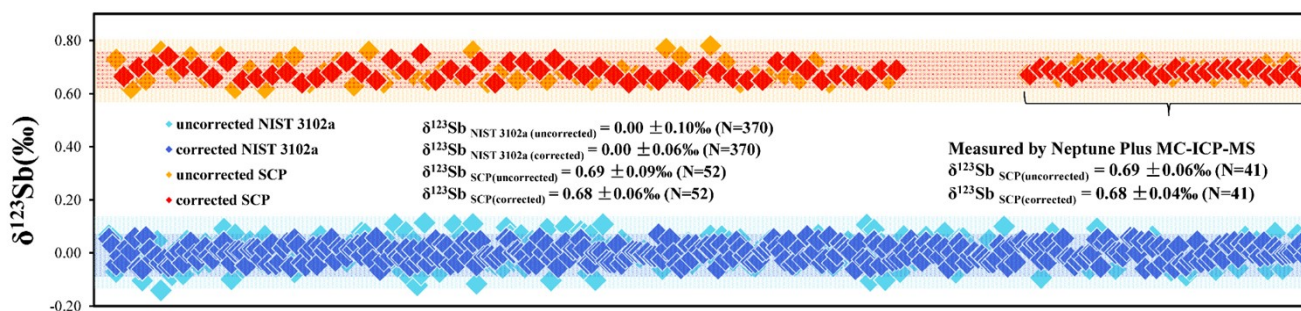

### Text 1. The precision estimated by propagation error

The  $\delta^{123}\text{Sb}_{\text{spl}}$  value is calculated from equation 10, and the precision can be estimated by error propagation<sup>1,2</sup>, using the following equation:

$$\sigma_{\text{spl}} = \sqrt{\left(\frac{1}{f} \cdot \sigma_{\text{mix}}\right)^2 + \left[\left(1 - \frac{1}{f}\right) \cdot \sigma_{\text{std}}\right]^2 + \left[\left(\frac{\delta^{123}\text{Sb}_{\text{mix}}}{-f^2} + \frac{\delta^{123}\text{Sb}_{\text{std}}}{f^2}\right) \cdot \sigma_f\right]^2} \quad (1)$$

where  $\sigma_{\text{spl}}$ ,  $\sigma_{\text{std}}$  and  $\sigma_{\text{mix}}$  represent the two standard deviations (2SD) of  $\delta^{123}\text{Sb}$  values of sample, standard solution, and mixed solution, respectively, and  $\sigma_f$  denote the 2SD of values of the relative proportions of sample and standard ( $f$ ).

Eq 1 can be reduced to Eq 2:

$$\sigma_{\text{spl}} = \sqrt{\left(\frac{\sigma_{\text{mix}}}{f}\right)^2 + \left(\frac{f-1}{f} \cdot \sigma_{\text{std}-3102a}\right)^2 + \left[\left(\frac{\delta^{123}\text{Sb}_{\text{std}-3102a} - \delta^{123}\text{Sb}_{\text{mix}}}{f^2}\right) \cdot \sigma_f\right]^2} \quad (2)$$

In this study, two Sb standard solutions (NIST SRM 3102a and SCP) were used for SA method. So, the final calculated  $\delta^{123}\text{Sb}_{\text{spl}}$  should be the mean value of the primary two  $\delta^{123}\text{Sb}_{\text{spl}}$  using different Sb standard solutions:

$$\delta^{123}\text{Sb}_{\text{spl}} = 1/2 \cdot (\delta^{123}\text{Sb}_{\text{spl by 3102a}} + \delta^{123}\text{Sb}_{\text{spl by SCP}}) \quad (3)$$

And the uncertainty can be estimated by error propagation:

$$\sigma_{\text{spl}} = \sqrt{\left(\frac{\sigma_{\text{spl by 3102a}}}{2}\right)^2 + \left(\frac{\sigma_{\text{spl by SCP}}}{2}\right)^2} \quad (4)$$

$\delta^{123}\text{Sb}_{\text{spl by 3102a}}$  and  $\delta^{123}\text{Sb}_{\text{spl by SCP}}$  are the calculated  $\delta^{123}\text{Sb}_{\text{spl}}$  using NIST 3102a and SCP as the standard addition solution. The  $\sigma_{\text{spl by 3102a}}$  and  $\sigma_{\text{spl by SCP}}$  represent their precision with 2SD.

As NIST 3102a was used as the isotope standard in this study,  $\delta^{123}\text{Sb}$  should be zero;  $\sigma_{\text{std-3102a}}$  in Eq 2 is 0.02‰, and  $\sigma_{\text{std-SCP}}$  is 0.04‰ as shown in Fig 2. Hence, the calculated  $\sigma_{\text{spl by 3102a}}$  is always less than  $\sigma_{\text{spl by SCP}}$ . To facilitate the assessment of propagation errors, we can substitute  $\sigma_{\text{spl by SCP}}$  for  $\sigma_{\text{spl-3102a}}$ . Thus,

$$\sigma_{\text{spl}} \approx \sqrt{\frac{1}{2} \cdot \left[ \left(\frac{\sigma_{\text{mix}}}{f}\right)^2 + \left(\frac{f-1}{f} \cdot \sigma_{\text{std-SCP}}\right)^2 + \left[\left(\frac{\delta^{123}\text{Sb}_{\text{std-SCP}} - \delta^{123}\text{Sb}_{\text{mix}}}{f^2}\right) \cdot \sigma_f\right]^2 \right]} \quad (5)$$
